# Supplementary material
Source: publisher figshare collection journal article supplement (https://gsajournals.figshare.com/ndownloader/files/14929754)

Hypothalamus

KEGG Pathway Enrichment: Genes that are repressed by reproductive experience (higher in virgins)

KEGG:mmu04720 Long-term potentiation

Enrichment FDR: 2.26E-05

Genes in list are highlighted in red

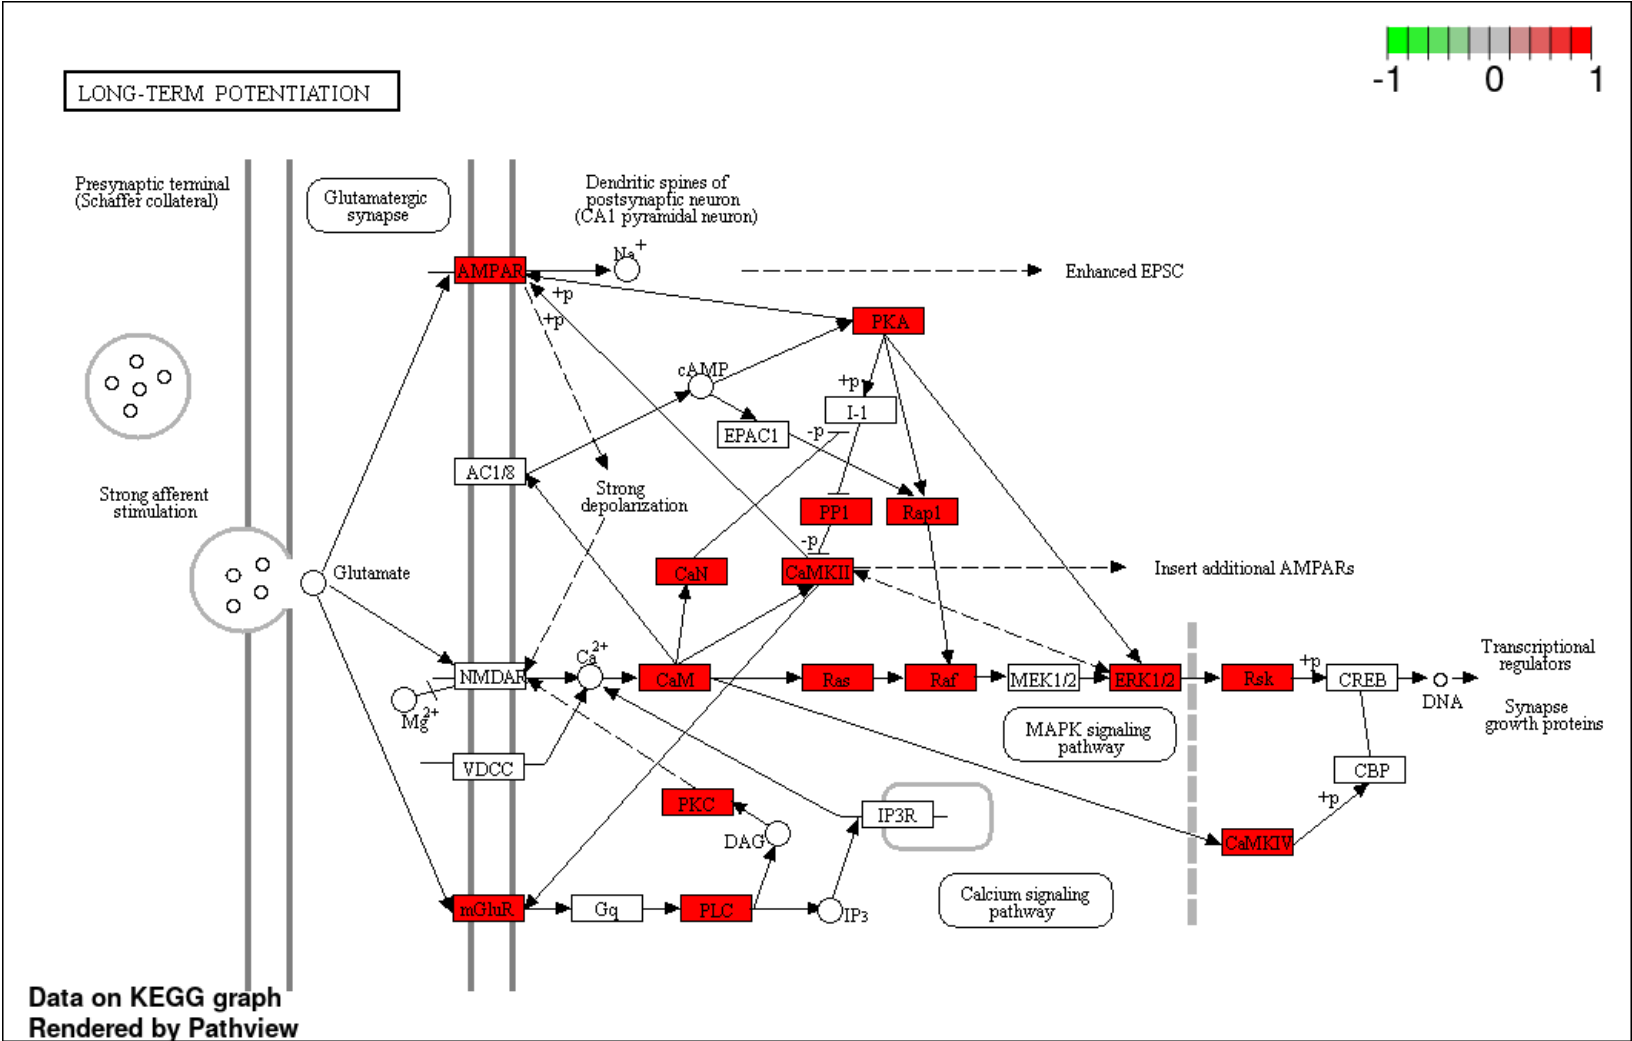

Supplement: Supplementary file 1 [file 14929754]
